# Supplementary material for: Chronic Nodular Prurigo: An Update on the Pathogenesis and Treatment
Source: MDPI journal article supplement (doi:10.3390/ijms232012390), 2022-10-16
Supplement: s1 [file s1]

**Table S1.** The inflammatory mediators, which were proposed to participate in the mechanisms of CNPG, and the proportion of AD predisposition in the studies.

| <b>Inflammatory mediators involved in the pathogenesis of CNPG</b> | <b>Proportion of patients with history of atopy included in the studies</b> |
|--------------------------------------------------------------------|-----------------------------------------------------------------------------|
| <b>Th2 cytokines</b>                                               |                                                                             |
| Park et al. [26]                                                   | Not mentioned                                                               |
| Tokura et al. [27]                                                 | No                                                                          |
| Fukushi et al. [28]                                                | No                                                                          |
| Belzberg et al. [24]                                               | No                                                                          |
| <b>IL-31</b>                                                       |                                                                             |
| Hashimoto et al. [36]                                              | Not mentioned                                                               |
| Chaowattanapanit et al. [37]                                       | 11.6% patients                                                              |
| <b>Th17/IL-17, Th22/IL-22</b>                                      |                                                                             |
| Park et al. [26]                                                   | Not mentioned                                                               |
| Belzberg et al. [24]                                               | No                                                                          |
| Wong et al. [18]                                                   | 25%                                                                         |
| <b>Endothelin</b>                                                  |                                                                             |
| Zhong et al. [19]                                                  | 45%                                                                         |
| Wong et al. [18]                                                   | 25%                                                                         |
| <b>Nerve growth factor</b>                                         |                                                                             |
| Zhong et al. [19]                                                  | 45%                                                                         |
